# Supplementary material for: Prenatal nursing intervention studies published in Korean nursing journals: a scoping review
Source: PubMed Central journal article supplement (PMC9328601; doi:10.4069/kjwhn.2020.06.12), 2020-06-22
Supplement: kjwhn-2020-06-12suppl2.pdf [file kjwhn-2020-06-12suppl2.pdf]

**Supplement 2 Literature review findings (N=45)**

| Author (year)                            | Research design | Theoretical framework                | Study participants                                  |              |       | Intervention                |                                                                                                                                                                                                         |                                                                                |                     | Outcome variables |          |                                |                                                                                                          |
|------------------------------------------|-----------------|--------------------------------------|-----------------------------------------------------|--------------|-------|-----------------------------|---------------------------------------------------------------------------------------------------------------------------------------------------------------------------------------------------------|--------------------------------------------------------------------------------|---------------------|-------------------|----------|--------------------------------|----------------------------------------------------------------------------------------------------------|
|                                          |                 |                                      | Pregnancy period (if primipara)/High-risk factors   | Sample size  | Scope | Setting /unit               | Name of intervention (contents)                                                                                                                                                                         | Methods (tools)                                                                | Experimental period |                   | Sessions | Time per session (minute)      | Follow-up period                                                                                         |
| I.                                       |                 |                                      |                                                     |              |       |                             |                                                                                                                                                                                                         |                                                                                |                     |                   |          |                                |                                                                                                          |
| I-1. Prenatal care & childbirth (n = 12) |                 |                                      |                                                     |              |       |                             |                                                                                                                                                                                                         |                                                                                |                     |                   |          |                                |                                                                                                          |
| Kim et al. [S1] (2017)                   | NRCT            | NA                                   | During pregnancy/None                               | E:39<br>C:40 | Women | Public health center /group | Maternal health care program (nutrition management, Lamaze breathing, newborn care, postpartum, care, breastfeeding communication with spouse for prevention of prenatal or postnatal depression, yoga) | Instruction, demonstration, and practice (video)                               | 8 wks               | 8                 | 120      | Immediately after intervention | Depression (-), self-confidence (maternal role) (+), self-confidence (childbirth) (+)                    |
| Kang et al. [S2] (1981)                  | NRCT            | NA                                   | During pregnancy (IUP over 32 wks) (primipara)/None | E:40<br>C:40 | Women | Hospital /individual +group | Prenatal education about normal course of labor (physiology and progress of labor and delivery, hygiene during pregnancy, preparation of childbirth)                                                    | Instruction and counseling                                                     | 1 day               | 1                 | 15-20    | During labor (latent phase)    | State anxiety (+)                                                                                        |
| Moon [S3] (1980)                         | NRCT            | NA                                   | During pregnancy (IUP over 36 wks) (primipara)/None | E:75<br>C:75 | Women | Hospital /group             | Prenatal education about normal course of labor (symptoms when birth is near, time to be hospitalized, progress of delivery and labor, breathing method)                                                | Instruction                                                                    | 1 day               | 1                 | 40       | 1 wk after intervention        | State anxiety (+)                                                                                        |
| Kim et al. [S4] (2011)                   | NRCT            | GROW Coaching Model (Whitmore, 2008) | During pregnancy (IUP over 28 wks) (primipara)/None | E:29<br>C:31 | Women | Hospital /group             | Coaching-based childbirth program (pregnancy adaptation with fetal growth, normal delivery, emergency management, emotional change, postpartum care, newborn care, preparation for parenthood)          | Instruction and counseling                                                     | 4 wks               | 4                 | 120      | Immediately after intervention | State anxiety (-), self-efficacy (childbirth) (+)                                                        |
| Park and Lee [S5] (2018)                 | NRCT            | NA                                   | During pregnancy (IUP over 32 wks) (primipara)/None | E:28<br>C:29 | Women | Hospital /individual +group | Experience-focused prenatal program (overall understanding of normal pregnancy, normal delivery, newborn care, breastfeeding)                                                                           | Instruction, practice, counseling, discussion and tour (PPT, video, and model) | 4 wks               | 4                 | 100      | Immediately after intervention | Antenatal stress (+), state anxiety (+), self-confidence (childbirth) (+), maternal-fetal attachment (+) |

(Continued to the next page)

| Author (year)             | Research design | Theoretical framework                               | Study participants                                       |              | Intervention      |                      |                                                                                                                                                                                                          |                                                       | Follow-up period | Outcome variables |                     |                                                 |                                                                                                                         |
|---------------------------|-----------------|-----------------------------------------------------|----------------------------------------------------------|--------------|-------------------|----------------------|----------------------------------------------------------------------------------------------------------------------------------------------------------------------------------------------------------|-------------------------------------------------------|------------------|-------------------|---------------------|-------------------------------------------------|-------------------------------------------------------------------------------------------------------------------------|
|                           |                 |                                                     | Pregnancy period (if primipara)/ High-risk factors       | Sample size  | Scope             | Setting /unit        | Name of intervention (contents)                                                                                                                                                                          | Methods (tools)                                       |                  |                   | Experimental period | Sessions                                        | Time per session (minute)                                                                                               |
| Sung et al. [S6] (2003)   | NRCT            | NA                                                  | During pregnancy (IUP 37-42 wks) (primipara) /None       | E:74<br>C:52 | Spouses           | Hospital /group      | Prepared childbirth education (Lamaze method, physiology and anatomy of pregnancy, labor, childbirth, normal versus cesarean delivery, newborn care, breastfeeding, postpartum care, family planning)    | Instruction and practice (booklet, video, OHP, model) | 5 wks            | 5                 | 120                 | < 2 hours post-delivery                         | Knowledge (childbirth) (+), spouse participation (+)                                                                    |
| Kim et al. [S7] (2002)    | NRCT            | NA                                                  | During pregnancy (IUP 28-32 wks) (primipara) /None       | E:25<br>C:33 | Women and spouses | Hospital /group      | Childbirth education (physiology and anatomy of pregnancy, antenatal care, Lamaze method, breathing, massage, relaxation, imagery, process of delivery, postpartum care, breastfeeding, Kegel exercises) | Instruction                                           | 4 wks            | 4                 | 150                 | 1 day post-delivery                             | State anxiety (-), labor pain (+), pulse (-), perceptions of delivery experience (+)                                    |
| Lee et al. [S8] (1998)    | NRCT            | Gate control theory of pain (Melzack & Casey, 1968) | During pregnancy (IUP 22-32 wks) (primipara) /None       | E:19<br>C:20 | Women and spouse  | Hospital /group      | Lamaze program (physiology and anatomy of pregnancy, process of delivery, nutrition, gymnastics, Lamaze method, breathing, relaxation, newborn care, breastfeeding)                                      | Instruction (video)                                   | 6 wks            | 6                 | 180                 | 1 hour post-delivery                            | Labor pain (+), pulse (-)                                                                                               |
| Kim et al. [S9] (1995)    | NRCT            | NA                                                  | During labor and birth (IUP 38-42 wks) (primipara) /None | E:35<br>C:35 | Women             | Hospital /individual | Breathing training education during childbirth in latent phase (Lamaze breathing, physiology, and process of labor and delivery)                                                                         | Instruction and practice                              | 1 day            | 5                 | Unclear             | During labor (latent phase)                     | State anxiety (+), labor pain (+)                                                                                       |
| Park [S10] (1987)         | NRCT            | Research framework (developed by researcher)        | During pregnancy (IUP 28-32 wks) (primipara) /None       | E:10<br>C:10 | Women and spouse  | Hospital /group      | Lamaze method education (Lamaze breathing and relaxation)                                                                                                                                                | Instruction and practice                              | 6 wks            | 6                 | 120                 | During labor (latent, active, transition phase) | State anxiety (+), labor pain (-), length of labor (+), Apgar score (-)                                                 |
| Han and Park [S11] (1985) | NRCT            | NA                                                  | During pregnancy (IUP 28-32 wks) (primipara) /None       | E:9<br>C:10  | Women and spouses | Hospital /group      | Lamaze prophylaxis education (awareness of pregnant women herself, breathing training, expectations of childbirth and infant abilities)                                                                  | Instruction and practice                              | 5 wks            | 5                 | 120                 | 2-3 days post-delivery                          | Maternal attitude (childrearing) (-), maternal sensitivity (+), infant response (+), mother-infant dyadic synchrony (-) |

(Continued to the next page)

| Author (year)                               | Research design          | Theoretical framework                | Study participants                                   |              |                   | Intervention               |                                                                                                                                                                                                                        |                                                                      |                     | Outcome variables |          |                                |                                                                                   |
|---------------------------------------------|--------------------------|--------------------------------------|------------------------------------------------------|--------------|-------------------|----------------------------|------------------------------------------------------------------------------------------------------------------------------------------------------------------------------------------------------------------------|----------------------------------------------------------------------|---------------------|-------------------|----------|--------------------------------|-----------------------------------------------------------------------------------|
|                                             |                          |                                      | Pregnancy period (if primipara)/ High-risk factors   | Sample size  | Scope             | Setting /unit              | Name of intervention (contents)                                                                                                                                                                                        | Methods (tools)                                                      | Experimental period |                   | Sessions | Time per session (minute)      | Follow-up period                                                                  |
| Kim et al. [S12] (2003)                     | One group pre-post study | NA                                   | During pregnancy/ None                               | 16           | Women             | Public health center/group | Sophrologic prenatal education programs (sophrologic method, relaxation, breathing, focusing, physiology and anatomy of childbirth, process of delivery, spouse support, breastfeeding, childrearing, postpartum care) | Instruction and practice                                             | 8 wks               | 8                 | Unclear  | Immediately after intervention | Knowledge (breastfeeding) (+), maternal-fetal attachment (-), antenatal stress(-) |
| I-2. Breastfeeding and breast care (n = 2)  |                          |                                      |                                                      |              |                   |                            |                                                                                                                                                                                                                        |                                                                      |                     |                   |          |                                |                                                                                   |
| Kim et al. [S13] (2011)                     | NRCT                     | NA                                   | During pregnancy (IUP over 35 wks) (primipara) /None | E:70<br>C:69 | Women             | Hospital /individual       | Prenatal breastfeeding education (breast assessment, breast care and massage, breastfeeding methods, postpartum breastfeeding problems)                                                                                | Instruction, demonstration and practice (booklet, video, PPT, model) | 2-4 wks             | 2                 | 25       | 12 wks post-delivery           | Breastfeeding methods (+), breastfeeding rate (+), knowledge (breastfeeding) (-)  |
| Park [S14] (1992)                           | NRCT                     | NA                                   | During pregnancy (IUP 20-30 wks) (primipara) /None   | E:51<br>C:75 | Women             | Hospital /group            | Prenatal breast care (breastfeeding methods and practice, breast care)                                                                                                                                                 | Instruction, practice and follow-up call                             | 1-2 wks             | 2                 | 60       | 2 months post-delivery         | Breastfeeding practice (+), breast discomfort (+)                                 |
| I-3. Newborn care and parental role (n = 3) |                          |                                      |                                                      |              |                   |                            |                                                                                                                                                                                                                        |                                                                      |                     |                   |          |                                |                                                                                   |
| Lee and Choi [S15] (2012)                   | NRCT                     | Self-efficacy theory (Bandura, 1977) | During pregnancy/ Immigrant women                    | E:17<br>C:16 | Women             | Community center /group    | Newborn care education program (physical and psychological characteristics of newborn, bathing, umbilical care, feeding, trimming, diapering, checking temperature, detection adverse symptom and care)                | Instruction, demonstration and practice (booklet, video, PPT, model) | 3 wks               | 3                 | 90       | Immediately after intervention | Knowledge (newborn care) (+), stress (+), self-efficacy (childrearing) (+)        |
| Han et al. [S16] (2010)                     | NRCT                     | NA                                   | During pregnancy (IUP 31-38 wks) (primipara) /None   | E:17<br>C:17 | Women and infants | Hospital /group            | Mother-fetus interaction promotion program (taekyo, importance of mother-fetus interaction, maternal role education)                                                                                                   | Instruction and discussion (booklet, PPT, sleep/activity record)     | 8 wks               | 8                 | 60       | 4 wks post-delivery            | Maternal sleep/activity (-), infant's sleep/activity (-)                          |

(Continued to the next page)

| Study participants                           |                 |                                      | Intervention                                         |              |                   |                             |                                                                                                                                                                                                                                                              |                                                                        |                     |                      |                           |                                |                                                                                           |
|----------------------------------------------|-----------------|--------------------------------------|------------------------------------------------------|--------------|-------------------|-----------------------------|--------------------------------------------------------------------------------------------------------------------------------------------------------------------------------------------------------------------------------------------------------------|------------------------------------------------------------------------|---------------------|----------------------|---------------------------|--------------------------------|-------------------------------------------------------------------------------------------|
| Author (year)                                | Research design | Theoretical framework                | Pregnancy period (if primipara)/ High-risk factors   | Sample size  | Scope             | Setting /unit               | Name of intervention (contents)                                                                                                                                                                                                                              | Methods (tools)                                                        | Experimental period | Sessions             | Time per session (minute) | Follow-up period               | Outcome variables                                                                         |
| Kim [S17] (2006)                             | NRCT            | NA                                   | During pregnancy (IUP over 32 wks) (primipara) /None | E:27<br>C:30 | Women and infants | Hospital /group             | Prenatal Parental Role Education Program (parental role education, infant care, mother-infant interaction, breastfeeding, integrated sensory stimulation)                                                                                                    | Instruction, practice and phone counseling (booklet, video, model)     | 4 wks               | 4 (+2 by phone call) | Unclear                   | 4 wks post-delivery            | Self-confidence (maternal role) (+), mother-infant interaction (+), infant BW (+), HC (+) |
| I-4. High-risk pregnancy health care (n = 4) |                 |                                      |                                                      |              |                   |                             |                                                                                                                                                                                                                                                              |                                                                        |                     |                      |                           |                                |                                                                                           |
| Ko and Lee [S18] (2014)                      | NRCT            | GROW Coaching Model (Whitmore, 2008) | During pregnancy (IUP 24 wks)/GDM                    | E:34<br>C:34 | Women             | Hospital /individual +group | Coaching Program on Comprehensive Lifestyle Modification for Women with GDM (glycemic control, diet and breastfeeding, exercise, delivery method, postpartum care)                                                                                           | Instruction, counseling and phone counseling (booklet, PPT, CD, diary) | 4 wks               | 4 (+4 by phone)      | 60 (20 by phone)          | 8 wks after intervention       | Knowledge (GDM) (-), self-care behavior (GDM) (+), depression (+), FBS (+), HbA1c (+)     |
| Kim and Kim [S19] (2013)                     | NRCT            | IMCHB (Cox, 1982)                    | During pregnancy (IUP 24-30 wks)/GDM                 | E:28<br>C:27 | Women             | Hospital /individual +group | Integrated Self-Management Program for Women with GDM (diet, exercise, stress management, self-checking and management of blood glucose, abdominal breathing, maternal role, maternal-fetal interaction, emotional reactions, postpartum care)               | Instruction and phone counseling (booklet)                             | 4 wks               | 3 (+2 by phone)      | 60 (10-15 by phone)       | 2 wks after intervention       | Self-management (GDM) (+), PP2 (+), HbA1c (-), maternal identity (+)                      |
| Baek and Park [S20] (2013)                   | NRCT            | Self-efficacy theory (Bandura, 1977) | During pregnancy (IUP 24-28 wks)/GDM                 | E:19<br>C:18 | Women             | Hospital /individual        | Case Management Program for Women with GDM (self-monitoring of blood glucose, diet, exercise, postpartum care, emotional reactions, incidence of type 2 diabetes, importance of goal setting and action of glycemic control, motivation and behavior change) | Counseling and phone counseling (booklet, diary)                       | 2 wks               | 1 (+5 by phone)      | Unclear                   | Immediately after intervention | Self-efficacy (GDM) (+), depression (+), anxiety (+)                                      |

(Continued to the next page)

| Study participants                               |                 |                                              | Intervention                                       |                        |       |                             |                                                                                                                                                                                                                                                                                                |                                                                                                                               |                     |                      |                           |                                |                                                                                                                                                           |
|--------------------------------------------------|-----------------|----------------------------------------------|----------------------------------------------------|------------------------|-------|-----------------------------|------------------------------------------------------------------------------------------------------------------------------------------------------------------------------------------------------------------------------------------------------------------------------------------------|-------------------------------------------------------------------------------------------------------------------------------|---------------------|----------------------|---------------------------|--------------------------------|-----------------------------------------------------------------------------------------------------------------------------------------------------------|
| Author (year)                                    | Research design | Theoretical framework                        | Pregnancy period (if primipara)/ High-risk factors | Sample size            | Scope | Setting /unit               | Name of intervention (contents)                                                                                                                                                                                                                                                                | Methods (tools)                                                                                                               | Experimental period | Sessions             | Time per session (minute) | Follow-up period               | Outcome variables                                                                                                                                         |
| Wang and Kim [S21] (2015)                        | NPCT            | Web-based teaching-learning system design    | During pregnancy (IUP < 20 wks)/ Advanced age      | E:30<br>C:31           | Women | Mobile website              | Mobile web-based pregnancy health care education for mothers at an advanced maternal age (understanding pregnancy at advanced age, fetal development, symptom control, health problems control, nutrition management, daily life, exercise, antenatal testing, emotional change, working life) | Instruction (mobile web site)                                                                                                 | 2 wks               | -                    | -                         | Immediately after intervention | Knowledge (+), self-efficacy (+), pregnancy health care practice behavior (pregnancy health care) (+)                                                     |
| I-5. Health-related behavior (n = 1)             |                 |                                              |                                                    |                        |       |                             |                                                                                                                                                                                                                                                                                                |                                                                                                                               |                     |                      |                           |                                |                                                                                                                                                           |
| Park and Lee [S22] (2018)                        | RCT             | IMCHB Cox (1982)                             | During pregnancy (IUP 16-24 wks) (primipara) /None | E1:23<br>E2:21<br>C:21 | Women | Hospital /individual +group | Oral health program and walking exercise program (oral health care and dietary management, walking exercise)                                                                                                                                                                                   | Instruction, demonstration, practice, counseling, phone counseling and text messages (booklet, video, diary, model, pictures) | 12 wks              | 3 (+9 by phone)      | 20-40                     | Immediately after intervention | Physical activity (+), periodontal disease (+), oral health behavior (+), antenatal stress (+), perceived stress (+), depression (+), quality of life (+) |
| II. Complementary Therapy (n = 17)               |                 |                                              |                                                    |                        |       |                             |                                                                                                                                                                                                                                                                                                |                                                                                                                               |                     |                      |                           |                                |                                                                                                                                                           |
| II-1. Relaxation and abdominal breathing (n = 4) |                 |                                              |                                                    |                        |       |                             |                                                                                                                                                                                                                                                                                                |                                                                                                                               |                     |                      |                           |                                |                                                                                                                                                           |
| Yu and Song [S23] (2010)                         | NPCT            | Research framework (developed by researcher) | During pregnancy (IUP 20-37 wks)/ Preterm labor    | E:30<br>C:30           | Women | Hospital /individual        | Abdominal breathing for pregnant women with preterm labor                                                                                                                                                                                                                                      | Instruction and practice                                                                                                      | 3 days              | 9                    | 1.6                       | Immediately after intervention | State anxiety (+), preterm labor stress (+), tocolytic dosage (+)                                                                                         |
| Chang et al. [S24] (2009)                        | NPCT            | Research framework (developed by researcher) | During pregnancy (IUP 24-37 wks)/ Preterm labor    | E:26<br>C:20           | Women | Hospital /individual        | Abdominal breathing for pregnant women with preterm labor                                                                                                                                                                                                                                      | Instruction and practice                                                                                                      | 3 days              | 3 (30 times/session) | 5                         | Immediately after intervention | State anxiety (+), BP, BT (+), S <sub>1</sub> O <sub>2</sub> (+)                                                                                          |

(Continued to the next page)

| Author (year)                          | Research design  | Theoretical framework | Study participants                                       |                | Intervention    |                         |                                                          |                                                          |                     |                       |                           | Follow-up period               | Outcome variables                                                       |
|----------------------------------------|------------------|-----------------------|----------------------------------------------------------|----------------|-----------------|-------------------------|----------------------------------------------------------|----------------------------------------------------------|---------------------|-----------------------|---------------------------|--------------------------------|-------------------------------------------------------------------------|
|                                        |                  |                       | Pregnancy period (if primipara)/ High-risk factors       | Sample size    | Scope           | Setting /unit           | Name of intervention (contents)                          | Methods (tools)                                          | Experimental period | Sessions              | Time per session (minute) |                                |                                                                         |
| Choi and Park [S25] (2010)             | NRCT             | NA                    | During pregnancy (IUP 20-38 wks)/ Preterm labor          | E:29<br>C:26   | Women           | Hospital /individual    | Relaxation therapy for pregnant women with preterm labor | Listening to a CD                                        | 5 days              | 10                    | 7                         | Immediately after intervention | Preterm labor stress (+), state anxiety (+), BP, BT, pulse (+), FHR (-) |
| Ahn [S26] (2008)                       | NRCT             | NA                    | During labor and birth (IUP 37-42 wks) (primipara) /None | E:15<br>C:21   | Women           | Hospital /individual    | Abdominal breathing during labor                         | Instruction and practice                                 | 1 day               | 2 (30 times/ session) | 5                         | Immediately after intervention | State anxiety (+), length of labor (-)                                  |
| II-2. Music Therapy (n = 4)            |                  |                       |                                                          |                |                 |                         |                                                          |                                                          |                     |                       |                           |                                |                                                                         |
| Oh et al. [S27] (2016)                 | RCT (cross over) | NA                    | During pregnancy (IUP 28-40 wks)/None                    | E:30<br>C:30   | Women           | Hospital /individual    | Music intervention during non-stress test                | Listening to music                                       | 1 day               | 2                     | 20                        | Immediately after intervention | State anxiety (+), BP, HR, BT (-), FHR (+)                              |
| Shin and Kim [S28] (2011)              | NRCT             | NA                    | During pregnancy (IUP before 14 wks)/None                | E:117<br>C:116 | Women           | Hospital /individual    | Music therapy during transvaginal ultrasound             | Listening to music                                       | 1 day               | 1                     | 30                        | Immediately after intervention | State anxiety (+), antenatal stress (-), maternal-fetal attachment (-)  |
| Park and Sung [S29] (2017)             | NRCT             | NA                    | During pregnancy (IUP 20-37 wks)/ Preterm labor          | E:17<br>C:18   | Women           | Hospital /individual    | Music therapy for pregnant women with preterm labor      | Listening to music                                       | 4 days              | 12                    | 15                        | Immediately after intervention | Preterm labor stress (+), frequency of uterine contraction (-)          |
| Kwon and Kim [S30] (2000)              | NRCT             | NA                    | During pregnancy/ Cesarean section                       | E:33<br>C:32   | Women           | Hospital /individual    | Music therapy for women undergoing a cesarean section    | Listening to music                                       | 2 days              | 3                     | 30                        | Immediately after intervention | State anxiety (+), BP, pulse, RR (+)                                    |
| II-3. Yoga and Qigong Training (n = 4) |                  |                       |                                                          |                |                 |                         |                                                          |                                                          |                     |                       |                           |                                |                                                                         |
| Ji et al. [S31] (2009)                 | NRCT             | NA                    | During pregnancy (IUP over 20 wks)/ None                 | E:21<br>C:20   | Women + infants | Community center/ group | Prenatal yoga                                            | Instruction, demonstration, practice, and follow-up call | 12 wks              | 24                    | 90                        | Postpartum                     | BMI (+), labor pain (+), discomfort after delivery (+), infant's BW (+) |

(Continued to the next page)

| Author (year)                               | Research design | Theoretical framework | Study participants                                       |              |                   | Intervention                     |                                                                                                                                                                                                         |                                                          |                     |          | Follow-up period | Outcome variables              |                                                                                           |
|---------------------------------------------|-----------------|-----------------------|----------------------------------------------------------|--------------|-------------------|----------------------------------|---------------------------------------------------------------------------------------------------------------------------------------------------------------------------------------------------------|----------------------------------------------------------|---------------------|----------|------------------|--------------------------------|-------------------------------------------------------------------------------------------|
|                                             |                 |                       | Pregnancy period (if primipara)/ High-risk factors       | Sample size  | Scope             | Setting /unit                    | Name of intervention (contents)                                                                                                                                                                         | Methods (tools)                                          | Experimental period | Sessions |                  |                                | Time per session (minute)                                                                 |
| Shim and Lee [S32] (2012)                   | NRCT            | NA                    | During pregnancy (IUP 12-20 wks)/ Pregnant with IVF      | E:23<br>C:23 | Women             | Hospital /group                  | Yoga-focused prenatal program in pregnant women with in vitro fertilization treatment (taekyo, lamaze, breastfeeding, process of delivery, newborn care, yoga)                                          | Yoga and instruction (CD)                                | 12 wks              | 12       | 75-80            | During labor                   | Antenatal stress (+), state anxiety (+), self-confidence (childbirth) (+), labor pain (+) |
| Jeong et al. [S33] (2006)                   | NRCT            | NA                    | During pregnancy (IUP 32-36 wks) /None                   | E:30<br>C:30 | Women             | Hospital /group                  | Qigong training program                                                                                                                                                                                 | Demonstration and practice                               | 4 wks               | 8        | 60               | < 1 hour after delivery        | State anxiety (+), labor pain (-)                                                         |
| Lee et al. [S34] (2006)                     | NRCT            | NA                    | During pregnancy/ None                                   | E:20<br>C:20 | Women             | Hospital /group                  | Qigong prenatal education program (definition, function, effects, nutrients, music, lifestyle of qigong taekyo, qigong training and meditation)                                                         | Instruction, demonstration, and practice                 | 4 wks               | 4        | 120              | Immediately after intervention | State anxiety (-), depression (+), physical symptoms (-)                                  |
| II-4. Therapeutic touch and massage (n = 2) |                 |                       |                                                          |              |                   |                                  |                                                                                                                                                                                                         |                                                          |                     |          |                  |                                |                                                                                           |
| Choi and Kim [S35] (2011)                   | NRCT            | NA                    | During pregnancy & labor and birth (IUP 32-42 wks)/None  | E:60<br>C:60 | Women and spouses | Hospital /individual +group      | Paternal's doula touch education (taekyo, fetus massage, normal process of delivery, doula touch, aroma massage, breathing method, newborn care, and breastfeeding) Paternal's doula touch during labor | Instruction, demonstration and practice (booklet, video) | 4 wks               | 4        | 120              | 8 hours post-delivery          | Couple attachment (+), paternal attachment (-), paternal role confidence (+)              |
| Jeon and Park [S36] (2015)                  | NRCT            | NA                    | During labor and birth (IUP 37-42 wks) (primipara) /None | E:25<br>C:25 | Women and spouses | Hospital /individual             | Spouse's hand massage of women with analgesia for vaginal delivery                                                                                                                                      | Instruction, demonstration and practice                  | 1 day               | 04-06    | 10               | 2 hours post-delivery          | State anxiety (+), spouse support (+), perception delivery experience (+)                 |
| II-5. Acupressure (n = 2)                   |                 |                       |                                                          |              |                   |                                  |                                                                                                                                                                                                         |                                                          |                     |          |                  |                                |                                                                                           |
| Shin et al. [S37] (2007)                    | NRCT            | NA                    | During pregnancy (IUP 18-35 wks)/None                    | E:16<br>C:13 | Women             | Public health center /individual | Hand stimulation intervention                                                                                                                                                                           | Acupressure                                              | 5 wks               | 15       | 40               | Immediately after intervention | Fatigue (-), cortisol level (+)                                                           |

(Continued to the next page)

| Author (year)                               | Research design | Theoretical framework | Study participants                                      |                       | Intervention      |                      |                                                                                                                                                                                                             |                                                                    |                     |          | Outcome variables |                                                                  |                                                                         |
|---------------------------------------------|-----------------|-----------------------|---------------------------------------------------------|-----------------------|-------------------|----------------------|-------------------------------------------------------------------------------------------------------------------------------------------------------------------------------------------------------------|--------------------------------------------------------------------|---------------------|----------|-------------------|------------------------------------------------------------------|-------------------------------------------------------------------------|
|                                             |                 |                       | Pregnancy period (if primipara)/ High-risk factors      | Sample size           | Scope             | Setting /unit        | Name of intervention (contents)                                                                                                                                                                             | Methods (tools)                                                    | Experimental period | Sessions |                   | Time per session (minute)                                        | Follow-up period                                                        |
| Shin and Song [S38] (2005)                  | RCT             | NA                    | During pregnancy (IUP 5-30 wks)/ Hyperemesis gravidarum | E:123<br>E:21<br>C:22 | Women             | Hospital /individual | Nei-guan (P6) acupressure for pregnant women with hyperemesis gravidarum                                                                                                                                    | Acupressure                                                        | 3-7 days            | 09-21    | 10                | Hospital days #3,4, discharge date (1-6 days after intervention) | Nausea/ vomiting, (+), discomfort (+)                                   |
| II-6. Aroma inhalation (n = 1)              |                 |                       |                                                         |                       |                   |                      |                                                                                                                                                                                                             |                                                                    |                     |          |                   |                                                                  |                                                                         |
| Go and Park [S39] (2017)                    | NRCT            | NA                    | During pregnancy (IUP 20-34 wks)/ High-risk pregnancy   | E:25<br>C:25          | Women             | Hospital /individual | Aroma inhalation therapy in high-risk pregnant women                                                                                                                                                        | Aroma inhalation                                                   | 5 days              | 15       | 2                 | Immediately after intervention                                   | Antenatal stress (+), state anxiety (-), depression (-), ANS (-)        |
| III. Psychosocial support (n = 6)           |                 |                       |                                                         |                       |                   |                      |                                                                                                                                                                                                             |                                                                    |                     |          |                   |                                                                  |                                                                         |
| III-1. Spouse support reinforcement (n = 3) |                 |                       |                                                         |                       |                   |                      |                                                                                                                                                                                                             |                                                                    |                     |          |                   |                                                                  |                                                                         |
| Eom et al. [S40] (2012)                     | NRCT            | NA                    | During pregnancy (IUP 37-42 wks)/None                   | E:62<br>C:60          | Women and spouses | Hospital /individual | One-session spouse-support enhancement childbirth education (importance of spouse support on labor and delivery, physiology and psychology of labor, relaxation, breathing, imagery, focusing, empowerment) | Instruction, demonstration, practice and discussion (PPT, picture) | 1 day               | 1        | 60                | 2 hours post-delivery                                            | Perception of childbirth experience (+), self-efficacy (childbirth) (-) |
| Kwak et al. [S41] (2004)                    | NRCT            | NA                    | During pregnancy (IUP 37-42 wks) (primipara) /None      | E:81<br>C:92          | Women and spouses | Hospital /individual | One-session spouse's support reinforcement prenatal education program (delivery process, spouse support method, relaxation, breathing and imagery)                                                          | Instruction and demonstration (booklet, picture, video)            | 1 day               | 1        | 60-120            | 1 day post-delivery                                              | Spouse support (+), spouse participation (+)                            |
| Ahn [S42] (1985)                            | NRCT            | NA                    | During pregnancy (IUP 28 wks) (primipara) /None         | E:70<br>C:70          | Women and spouses | Hospital /group      | Husband's supportive behavior reinforcement education (spousal physical and psychological support behavior)                                                                                                 | Instruction (animation, audio tape)                                | 4 wks               | 6        | 25                | 4 wks post-intervention                                          | Spouse support (+), antenatal stress (+)                                |

(Continued to the next page)



| Author (year)                               | Research design | Theoretical framework | Study participants                                                   |                        | Intervention                |                             |                                                                                                                                                                                                                         |                        |                     |          | Outcome variables |                           |                                                                              |
|---------------------------------------------|-----------------|-----------------------|----------------------------------------------------------------------|------------------------|-----------------------------|-----------------------------|-------------------------------------------------------------------------------------------------------------------------------------------------------------------------------------------------------------------------|------------------------|---------------------|----------|-------------------|---------------------------|------------------------------------------------------------------------------|
|                                             |                 |                       | Pregnancy period (if primipara)/ High-risk factors                   | Sample size            | Scope                       | Setting /unit               | Name of intervention (contents)                                                                                                                                                                                         | Methods (tools)        | Experimental period | Sessions |                   | Time per session (minute) | Follow-up period                                                             |
| III-2. Family participated delivery (n = 3) |                 |                       |                                                                      |                        |                             |                             |                                                                                                                                                                                                                         |                        |                     |          |                   |                           |                                                                              |
| Oh et al. [543] (2006)                      | NRCT            | NA                    | During pregnancy & labor and birth (IUP 28-32 wks) (primipara) /None | E1:17<br>E2:20<br>C:20 | Women and spouses or family | Hospital /individual +group | Childbirth education and family participated delivery in a labor-delivery-recovery room (Lamaze method, relaxation, breathing, imagery, normal delivery process, breastfeeding, newborn care, bathing, postpartum care) | Instruction and others | 4 wks               | 4        | 120               | 1 hour post-delivery      | State anxiety (-), labor pain (-), perception of childbirth experience (+)   |
| Jang and Park [544] (2002)                  | NRCT            | NA                    | During labor and birth (IUP 37-42 wks) (primipara) /None             | E:30<br>C:30           | Women and spouses or family | Hospital /individual        | Family-participated delivery in a labor delivery room                                                                                                                                                                   | Others                 | 1 day               | 1        | -                 | > 3 hours post-delivery   | Length of labor (+), labor pain (-), perception of childbirth experience (+) |
| Choi and Kim [545] (2013)                   | NRCT            | NA                    | During labor and birth (IUP 37-42 wks) / Cesarean section            | E:34<br>C:32           | Spouse                      | Hospital /individual        | Father participation program in cesarean section (explanation of procedure of cesarean section, handwashing, gowning, capping, asking, emotional support, infant attachment)                                            | Instruction and others | 1 day               | 1        | 37                | 3 days post-delivery      | Father-infant attachment (+)                                                 |

ANS: autonomic nervous system; BMI: body mass index; BP: blood pressure; BT: skin temperature; BW: body weight; C: control group; CD, compact disc; E: experimental group; FBS: fasting blood sugar; FHR: fetal heart rate; GDM: gestational diabetes mellitus; GROW: goal-reality-options-will; HbA1C: hemoglobin A1C; HC: head circumference; HR: heart rate; IMCHB: interaction model of client health behavior; IUP: intrauterine period; NA: not applicable; NRCT: non-randomized controlled trial; PPT: PowerPoint slides; PP2: postprandial 2-hour blood glucose test; RCT: randomized controlled trial; S<sup>2</sup>O<sup>2</sup>: oxygen saturation; wks: weeks.
